**The miR-124-AMPA pathway connects polygenic risks with behavioral changes shared  
between schizophrenia and bipolar disorder**

Ho Namkung<sup>1,2</sup>, Hiroshi Yukitake<sup>2,10</sup>, Daisuke Fukudome<sup>2</sup>, Brian J. Lee<sup>2</sup>, Gianluca Ursini<sup>2,9</sup>,  
Shravika Lam<sup>2,3</sup>, Suvarnambiga Kannan<sup>2,5</sup>, Atsushi Saito<sup>2</sup>, Minae Niwa<sup>2,11</sup>, Kamal Sharma<sup>2,3</sup>,  
Peter Zandi<sup>2,5,6</sup>, Hanna Jaaro-Peled<sup>2</sup>, Koko Ishizuka<sup>2</sup>, Nilanjan Chatterjee<sup>6,7</sup>, Richard  
Huganir<sup>2,3,8</sup>, and Akira Sawa<sup>1,2,3,4,5\*</sup>

Departments of <sup>1</sup>Biomedical Engineering, <sup>2</sup>Psychiatry, <sup>3</sup>Neuroscience, and <sup>4</sup>Genetic Medicine,  
Johns Hopkins University School of Medicine, Baltimore, MD 21205 USA.

Departments of <sup>5</sup>Mental Health, <sup>6</sup>Epidemiology, and <sup>7</sup>Biostatistics, Johns Hopkins University  
Bloomberg School of Public Health, Baltimore, MD 21205, USA.

<sup>8</sup>Kavli Neuroscience Discovery Institute, Johns Hopkins University, Baltimore, MD 21205,  
USA.

<sup>9</sup>Lieber Institute for Brain Development, Johns Hopkins Medical Campus, Baltimore, MD  
21205, USA

<sup>10</sup>Current address: Takeda Pharmaceutical Company Ltd., Fujisawa, Japan.

<sup>11</sup>Current address: Department of Psychiatry and Behavioral Neurobiology, University of  
Alabama at Birmingham, Birmingham, AL, 35233, USA.

\*To whom correspondence should be addressed: Akira Sawa, [asawa1@jhmi.edu](mailto:asawa1@jhmi.edu)

## SUMMARY

Schizophrenia (SZ) and bipolar disorder (BP) are highly heritable major psychiatric disorders that share a substantial portion of genetic risk as well as their clinical manifestations. This raises a fundamental question of whether, and how, common neurobiological pathways translate their shared polygenic risks into shared clinical manifestations. The present study shows the miR-124-AMPA pathway as a key common neurobiological mediator that connects polygenic risks with behavioral changes shared between these two psychotic disorders. We discovered upregulation of miR-124 in biopsied neuronal cells and postmortem prefrontal cortex from both SZ and BP patients, implying its role not only as a biomarker, but also as a pathophysiological mediator. Intriguingly, the upregulation is associated with the polygenic risks shared between these two disorders. Seeking mechanistic dissection, we generated a mouse model that upregulates miR-124 in the medial prefrontal cortex, which includes brain regions homologous to sub-regions of the human prefrontal cortex. We demonstrated that upregulation of miR-124 increases GRIA2-lacking calcium permeable-AMPA receptors and perturbs AMPAR-mediated excitatory synaptic transmission, leading to deficits in the behavioral dimensions shared between SZ and BP.

## INTRODUCTION

Psychiatric conditions are currently a major social and medical burden. Despite considerable efforts for their prevention and treatment in clinical studies, there have been few advances mainly due to our shortage in understanding of their neurobiological mechanisms. Recent advances in psychiatric genomics have illuminated polygenic contributions of common genetic variants to psychiatric conditions, with each having a small effect size (Consortium et al., 2020; Gandal et al., 2016; Geschwind and Flint, 2015; Mullins et al., 2021; O'Donovan and Owen, 2016). Translating these genetic insights into clinical manifestations through intermediate neurobiological pathways may provide a foundation for understanding the pathophysiological mechanisms of these conditions (Namkung et al., 2018). Constructing a novel research framework that realizes this goal may be indispensable to reshaping clinical psychiatry in a neurobiological mechanism-based manner.

Schizophrenia (SZ) and bipolar disorder (BP) are highly heritable major psychiatric disorders that share a substantial number of common genetic risk factors (Geschwind and Flint, 2015; Lee SH, 2013; Ruderfer et al., 2018). Emerging evidence suggests convergence of these shared genetic variants onto molecular pathways which include those underlying synaptic function (Gandal et al., 2018; Ruderfer et al., 2018). SZ and BP also have overlapping deficits in multiple behavioral dimensions from a clinical viewpoint (Ruderfer et al., 2018). However, it has remained elusive whether, and how, their shared polygenic risks converge onto specific molecular pathways that regulate synaptic function, which in turn affects shared behavioral dimensions.

MicroRNAs (miRNAs) are a class of small non-coding RNAs that regulate gene expression at the post-transcriptional level (Bartel, 2004; He and Hannon, 2004). MicroRNA-124 (miR-124) is the most abundant and well-conserved brain-specific miRNA (Krichevsky et al., 2003; Lagos-Quintana et al., 2002; Sanuki et al., 2011). Consistent with its high expression in neurons but low in glial cells (Jovicic et al., 2013), it has been shown to play a key role in neuronal differentiation and neurogenesis (Cheng et al., 2009; Yoo et al., 2011). Emerging evidence also emphasizes the significance of this neuron-enriched miRNA (miR-124) in regulating synaptic function, implying its potential engagement in brain disorders (Gascon et al., 2014; Hou et al., 2015; Rajasethupathy et al., 2009; Sanuki et al., 2011; Wang et al., 2018). In particular, it has been shown to support the regulation of AMPAR-mediated excitatory synaptic transmission (Gascon et al., 2014; Ho et al., 2014; Hou et al., 2015; Wang et al., 2018). However, it is still unknown whether, and how, miR-124-mediated synaptic function drives behavioral dimensions relevant to SZ and BP.

Supported by the discovery on upregulation of miR-124 in biopsied neuronal cells, followed by its validation in postmortem prefrontal cortex, from both SZ and BP patients and its association with their shared polygenic risks, we explored a specific miR-124 pathway that connects polygenic risks with behavioral changes shared between these two psychotic disorders. A mouse model that upregulates miR-124 in the medial prefrontal cortex, which includes brain regions homologous to sub-regions of the human prefrontal cortex, demonstrated that upregulation of miR-124 increases GRIA2-lacking calcium permeable-AMPARs and perturbs AMPAR-mediated excitatory synaptic transmission, leading to deficits in the behavioral dimensions shared between SZ and BP. Taken altogether, this study provides not only a novel neurobiological insight into how miR-124-mediated synaptic function impacts behavioral

dimensions of psychiatric relevance, but also a new translational research framework in which human and animal studies are combined to address a disease mechanism that bridges across pathogenesis, pathophysiology, and phenotypic/clinical manifestations.

## RESULTS

### **Upregulation of microRNA-124 (miR-124) discovered in biopsied neuronal cells from living patients with SZ and those with BP**

The use of biopsied tissues from patients with active symptomatic manifestation has been regarded as indispensable not only for discovering reliable biomarkers, but also for studying pathophysiological mechanisms in many medical conditions, such as several types of cancers, liver disorders such as hepatitis, and lung disorders including idiopathic pulmonary fibrosis (Hunninghake et al., 2001; Iacobellis and Bianco, 2011; Mattie et al., 2006; Rockey et al., 2009; Siravegna et al., 2017). However, due to the difficulty in accessing the brain in living patients, this strategy has not been utilized in psychiatry (Gamo and Sawa, 2014). To overcome this limitation, investigators have recently highlighted the utility of olfactory epithelium (OE)-derived neuronal cells (henceforth, ‘olfactory neuronal cells’), easily accessible through a nasal biopsy, as a promising surrogate that captures neuron-relevant molecular signatures in the course of functional impairment in living patients with major psychiatric disorders (Arnold et al., 1998; Borgmann-Winter et al., 2016; Doostparast Torshizi et al., 2019; Evgrafov et al., 2020; Feron et al., 1998; Hahn et al., 2005; Kano et al., 2013; Lavoie et al., 2017; Mackay-Sim, 2012; Rhie et al., 2018). Thus, we initiated the present study by analyzing gene expression profiles of olfactory neuronal cells from patients with schizophrenia (SZ) compared to those from healthy controls (CON): a microarray analysis identified 854 dysregulated genes in SZ, with 330 genes being

upregulated and 524 genes being downregulated (**Figure S1**). We next performed a pathway enrichment analysis with these dysregulated genes in order to identify key pathways that were perturbed in SZ (**Figure 1A**). While most of the top-listed pathways, such as the glutathione metabolic pathway (Do et al., 2000), were reasonably expected in the context of SZ pathophysiology, it was unexpectedly discovered that putative targets of microRNA-124 (miR-124), one of the most abundant microRNAs in the brain (Sanuki et al., 2011), were significantly enriched in genes displaying decreased expression in SZ.

We therefore hypothesized that miR-124 is significantly upregulated in olfactory neuronal cells from SZ patients. Given that SZ and bipolar disorder (BP) share a substantial portion of molecular pathways underlying their pathophysiology (Gandal et al., 2018; Shao and Vawter, 2008), we further hypothesized that miR-124 is also dysregulated in olfactory neuronal cells from BP patients. To validate these hypotheses, we measured miR-124 expression levels in olfactory neuronal cells from CON, SZ, and BP subjects by performing quantitative real-time polymerase chain reaction (qRT-PCR), and subsequently found that miR-124 is significantly upregulated in olfactory neuronal cells from both SZ and BP patients, compared to those from CON (**Figure 1B**). We also examined, in olfactory neuronal cells, several other microRNAs which have been reportedly dysregulated in SZ and/or BP patients (Beveridge et al., 2010; Kim et al., 2010; Santarelli et al., 2011; Siegert et al., 2015). We detected disease-relevant changes in all microRNAs we tested, including miR-17, -107, -132, -134, and -652 (**Figure 1C**), with their alterations in olfactory neuronal cells being consistent with those previously found in the postmortem prefrontal cortex (PFC) (Beveridge et al., 2010; Kim et al., 2010; Santarelli et al., 2011). In addition, we found an alteration of miR-137 in olfactory neuronal cells from SZ

patients (**Figure 1C**), consistent with what was reported in induced human neurons (Siegert et al., 2015). These data indicate the utility of biopsied olfactory neuronal cells to study dynamic changes of microRNAs in living patients with psychotic disorders. Notably, the magnitude and significance of the observed alterations were most robust in miR-124 compared with those of other microRNAs we tested, implying its potential role not only as a reliable biomarker, but also as a pathophysiological mediator (**Figures 1B and 1C**).

The human PFC has been significantly implicated in the pathophysiology of both SZ and BP (Ellison-Wright and Bullmore, 2010; Gandal et al., 2018; Konopaske et al., 2014; Shao and Vawter, 2008). Gene expression profiling has showed that molecular signatures relevant to the PFC are reasonably represented in olfactory neuronal cells (Doostparast Torshizi et al., 2019). Together, we hypothesized that olfactory neuronal cells are a promising surrogate that captures neuron-relevant molecular signatures in the PFC, and that our observation in olfactory neuronal cells may be a recapitulation of important molecular changes in PFC. Thus, we first examined published data of RNA sequencing from the postmortem PFC (Fromer et al., 2016). Consistent with the finding from olfactory neuronal cells, pathway enrichment analysis identified that putative targets of miR-124 were significantly downregulated in the SZ postmortem dorsolateral PFC (DLPFC: BA9 and BA46) (**Table S1**), implying a potential upregulation of miR-124. Indeed, the primary miR-124-2 [pri-miR-124-2, also known as miR-124-2 host gene (miR-124-2HG)] and precursor miR-124-2 (pre-miR-124-2) were found to be significantly upregulated in the postmortem DLPFC from SZ and BP, respectively, in an independent cohort (Jaffe et al., 2018). (**Figures S2A and S2B**). Furthermore, recent genome-wide association studies (GWAS) have indicated that single nucleotide polymorphisms (SNPs) near or within the pri-/pre-miR-

124-2 and pri-/pre-miR-124-1 gene loci have been shown to confer risks for SZ and BP, respectively (Consortium et al., 2020; Mullins et al., 2021) (**Figures S2C and S2D**). We could access another sub-region of the postmortem PFC (BA45, adjacent to the DLPFC) from patients with SZ, BP, and major depressive disorder (MDD), as well as CON subjects (Torrey et al., 2000). We thus conducted qRT-PCR and detected an upregulation of miR-124 only in SZ and BP, but not in MDD, when compared with CON (**Figure 1D**). Taken together, miR-124 may be dysregulated on a relatively broad range of the PFC specifically in SZ and BP. In contrast, miR-124 expression levels were not significantly different between CON and SZ lymphoblasts (LB), implying that dysregulation of miR-124 may be a molecular signature that is specific to neural tissues (**Figure 1D**).

### **MiR-124 serves as a key pathophysiological mediator that connects polygenic risks with clinical manifestations shared between SZ and BP**

SZ and BP share substantial polygenic risk factors, which may underlie their common molecular pathways (Gandal et al., 2018; Purcell et al., 2009; Shao and Vawter, 2008). It is also known that SZ and BP share some clinical manifestations and aberrant behavioral dimensions (Pearlson, 2015; Ruderfer et al., 2018). Thus, we hypothesized that miR-124 may serve as a key mediator linking the shared polygenetic risks and common clinical feature(s) that can exist in both SZ and BP. To this end, we calculated polygenic risk scores (PRSs) in our independent samples of European ancestry using four GWAS summary statistics (Ruderfer et al., 2018): (i) combined SZ and BP cases vs. combined SZ and BP controls (SZ+BP PRSs); (ii) SZ cases vs. SZ controls (SZ PRSs); (iii) BP cases vs. BP controls (BP PRSs); and (iv) SZ cases vs. BP cases (SZ vs. BP PRSs) (**Figure 2A**). Applying logistic regression analysis, we found that polygenic risks shared



between SZ and BP (SZ+BP PRSs) account for a substantial proportion (14%) of the variance in case-control status (either SZ or BP vs. CON) (**Figure 2B**). We next tested whether the shared polygenic risks are also associated with miR-124 expression. Linear regression analysis showed that SZ+BP PRSs significantly predict miR-124 expression, accounting for 17.4% of its variance, at the *p*-value threshold where the PRSs best account for the diagnosis of either SZ or BP (**Figure 2C**).

We then tested whether miR-124 serves as a key mediator between the shared polygenic risks and either diagnosis. To address this question, we applied mediation analysis, a method which is widely used across many disciplines to explore pathways via mediators (MacKinnon et al., 2007). We found that miR-124 is a significant mediator in the effects of shared polygenic risks on either diagnosis, accounting for 30.7% of the total effect (**Figure 2D**). In summary, these results indicate that miR-124 functions as an important mediator between the shared polygenic contributions and two diseases (both SZ and BP) (**Figure 2E**). Complementing these results, we also applied Mendelian randomization, and found a potential causal role of miR-124 in either SZ or BP by using the pre-miR-124-1-associated SNP rs28548961 as an instrument (**Figure S3**). Given that SZ and BP share clinical and behavioral manifestations to some extent, these genetic data may represent the biological scenario that the pathway involving miR124 links shared polygenic risks to neuro-behavioral changes shared in SZ and BP. We decided to address the validity of this notion in animal studies described below.

**Overexpression of miR-124 in the PFC leads to deficits in the behavioral dimensions relevant to both SZ and BP, and perturbs excitatory synaptic transmission**

Given that miR-124 is upregulated in olfactory neuronal cells and PFC from the patients, we decided to further explore a potential mechanism by which the upregulation of miR-124 in the PFC causally drives phenotypes relevant to both SZ and BP. Accordingly, we generated a mouse model overexpressing miR-124 in neurons of the medial PFC (mPFC) by bilaterally delivering adeno-associated viruses (AAVs) that express miR-124 under the synapsin promoter. The mPFC was particularly targeted because it includes brain regions homologous to many sub-regions of the human PFC (Heilbronner et al., 2016; Hoover and Vertes, 2007; Laubach et al., 2018; Wise, 2008). While comparative neuroanatomy between humans and mice still involves some debate, we believe that our choice of mPFC is reasonable given the brain regions where we observed the alteration of miR-124 (**Figure S4**) (Heilbronner et al., 2016; Hoover and Vertes, 2007; Laubach et al., 2018; Wise, 2008). We assayed the miR-124-overexpressing mice with a behavioral test battery that addresses dimensions commonly impaired in many cases of SZ and BP (**Figure S5A**). As a result, we identified behavioral deficits in social interaction and psychostimulant sensitivity, both of which are relevant to SZ and BP (**Figures S5B-S5E**) (Lieberman et al., 1987; Mancuso et al., 2011).

We then asked whether these behavioral phenotypes are dependent on neuronal subtypes. Given that the mouse mPFC innervates brain regions implicated in social interaction and psychostimulant sensitivity, such as the nucleus accumbens and the ventral tegmental area (Deng et al., 2010; Murugan et al., 2017), we focused on investigating excitatory neurons in the mPFC, which are the dominant source of cortical outputs (Brown and Hestrin, 2009; Spruston, 2008). We therefore overexpressed miR-124 in excitatory neurons of the mPFC by bilaterally delivering AAVs that express miR-124 fused to EmGFP under the CaMKII $\alpha$  promoter (**Figure 3A**). As a

result, miR-124 was increased approximately 2.4-fold in miR-124-overexpressing excitatory neurons, which is of a comparable degree to the endogenous upregulation of miR-124 in olfactory neuronal cells from SZ and BP patients (**Figure 3B**). The excitatory neuron-specific overexpression of miR-124 reproduced the behavioral phenotypes induced by neuronal overexpression of miR-124 and showed even more significant changes (**Figures 3C and 3D**), implying that excitatory neurons in the mPFC may have a dominant role in driving such behavioral phenotypes. We next sought to address a synaptic mechanism that may underlie the behavioral deficits. We recorded miniature excitatory postsynaptic currents (mEPSCs) in layer V pyramidal neurons of the mPFC, the main output neurons of the mPFC (Brown and Hestrin, 2009). The layer V pyramidal neurons overexpressing miR-124 displayed a significant increase in the amplitude of mEPSCs with no concurrent change in the frequency of mEPSCs, indicating alterations in AMPA receptor (AMPA)-mediated synaptic transmission (**Figure 3E**).

### **Overexpression of miR-124 increases GRIA2-lacking calcium-permeable AMPARs (CP-AMPA)s**

Next, we investigated a potential molecular mechanism by which miR-124 upregulation alters AMPAR-mediated synaptic transmission that in turn drives the previously observed behavioral phenotypes. To address this, we looked for the relevant downstream targets of miR-124 and narrowed them down to 12 genes by identifying the overlapping genes of the following four databases: (i) sequence matching-based putative target database; (ii) Ago-miRNA-mRNA interaction database; (iii) experimentally-screened target database; and (iv) database for the genes downregulated in the cerebral cortex from both patients with SZ and those with BP (**Figure 3F**). Among these 12 candidates, there were 2 molecules that could directly affect

AMPA-mediated synaptic transmission: *GRIA2* (AMPA subunit 2) (Studniarczyk et al., 2013) and *ADARB1* (RNA editing enzyme acting on *GRIA2* pre-mRNA at the Q/R site) (Liu et al., 2004). We found that expression of both genes is downregulated upon miR-124 overexpression in mouse mPFC excitatory neurons (**Figure 3G**) and confirmed these molecular changes in human olfactory neuronal cells (**Figure 3H**). AMPARs are calcium-permeable if they lack the GRIA2 subunit or if they contain the unedited GRIA2(Q) subunit (Henley and Wilkinson, 2016). Thus, downregulation of either *Gria2* or *Adarb1* by miR-124 overexpression can increase the abundance of calcium-permeable AMPARs (CP-AMPARs) (Gascon et al., 2014; Hou et al., 2015), which can in turn increase the postsynaptic conductance of AMPARs and mEPSC amplitude. The modest downregulation of *Adarb1* induced by miR-124 overexpression did not affect RNA editing efficiency of *Gria2* (**Figure S6A**). However, the more robust downregulation of *Gria2* mRNA induced by miR-124 overexpression led to a significant reduction in surface GRIA2 protein expression (**Figure S6B**). This implies that downregulation of GRIA2, but not ADARB1, can lead to increase in CP-AMPARs.

### **Blockage or reversal of GRIA2-lacking CP-AMPARs ameliorates the synaptic and behavioral deficits relevant to SZ and BP**

We then addressed whether the increase in GRIA2-lacking CP-AMPARs induced by miR-124 overexpression causes increase in the amplitude of mEPSCs. Bath application of Naspnm, a selective antagonist of CP-AMPARs, on miR-124-overexpressing brain slices normalized the increased amplitude of mEPSCs, proving the causality of the increase in CP-AMPARs on the increase in mEPSC amplitude (**Figure 4A**). As a result, we questioned whether the increase in CP-AMPARs directly causes the behavioral deficits in social interaction and psychostimulant

sensitivity. We found that the behavioral deficits in social interaction and psychostimulant sensitivity were ameliorated by local infusion of Nasp, but not saline, into the mPFC, implying the causality of increased CP-AMPA receptors on the behavioral deficits (**Figures 4B and 4C**). We finally tested whether the restoration of GRIA2 alone could also ameliorate the behavioral deficits. We introduced AAV-mediated expression of GRIA2, along with miR-124, in mouse mPFC excitatory neurons. As a result, the mice with restored GRIA2 in the mPFC showed amelioration of their behavioral deficits, showing the causal effect of GRIA2 downregulation on the behavioral phenotypes (**Figures 4D and 4E**).

## DISCUSSION

In the present study, we leveraged a novel research framework in which human and animal studies are combined to address a disease mechanism that bridges across pathogenesis, pathophysiology, and phenotypic/clinical manifestations. This framework enabled us to link together multiple layers from genetics, molecular and cellular mediators, and circuitry, to behavior in an integrative manner. Utilizing this research framework, we demonstrated that upregulation of miR-124, which is associated with the polygenic contribution shared between SZ and BP, increases GRIA2-lacking CP-AMPA receptors and perturbs AMPAR-mediated excitatory synaptic transmission, eventually leading to behavioral deficits commonly relevant to SZ and BP. Our research framework is also applicable to a wide range of other psychiatric conditions particularly when aiming to translate polygenic insights into clinical manifestations through mechanistically defined neurobiological pathways.

Examining miR-124 in olfactory neuronal cells, which are easily obtainable from living human subjects through a nasal biopsy, holds promise in that this molecule may be used as a biomarker for the shared pathophysiology of SZ and BP. Efforts to minimize the invasiveness of the biopsy have recently been made, including the method of obtaining neuronal cells via soft brush swab that can be applied to children (Lavoie et al., 2017). Given that the detection of pathological molecular signatures from early, pre-symptomatic stages is known to be important in brain disorders, like the case of mild cognitive impairment that precedes Alzheimer's disease (Hampel et al., 2004; Jack et al., 2010), profiling miR-124 expression of olfactory neuronal cells from subjects at clinically and/or genetically high risk to SZ and BP in their pre-symptomatic stages will have prophylactic significance.

Although the present study supports the utility of olfactory neuronal cells as a surrogate to estimate disease-associated molecular changes in PFC neurons, we acknowledge that disease-associated changes of miR-124 are less prominent in the postmortem PFC than in olfactory neuronal cells from living patients with active symptoms. A major challenge of using postmortem brains in the study of psychotic disorders whose onsets are usually in late adolescence and young adulthood is that they may not fully capture molecular signatures in patients with full symptomatic manifestation (Lavoie et al., 2017; Namkung et al., 2018). In addition, disease-associated molecular signatures may be masked by effects of long-term medications and substance abuse as well as compensatory changes over the lifetime (Yang and Sawa, 2017). It is therefore possible that disease-associated changes of miR-124 may become diluted over the lifetime and eventually less prominent in the postmortem brain than in olfactory neuronal cells that were biopsied when the symptoms were active. Together, olfactory neuronal

cells may enable not only to avoid a false negative pitfall arising from confounding factors in the postmortem brain, but also to discover novel molecular pathways captured in biopsied neuronal cells from patients with active psychiatric symptoms. Additionally, while we focused on studying the mouse mPFC based on human postmortem evidence, we cannot rule out the possibility that miR-124 is dysregulated in other brain regions of SZ and BP patients, which may underlie behavioral dimensions other than those observed in our mouse model. Finally, it should be noted that, although GRIA2 has been found to be a crucial downstream target of miR-124 that can mediate the observed synaptic and behavioral phenotypes in the present study, other targets of miR-124 may play crucial roles in different behavioral dimensions.

We also admit that the present study includes additional caveats. Firstly, while a strategy integrating PRS associations with mediation analysis enabled us to identify miR-124 as a potential pathophysiological mediator that connects pathogenic (genetic) and phenotypic feature(s) common to SZ and BP, it remains at the level of causal inference: this does not rigorously demonstrate the causality among these components, in particular because PRSs constructed from many SNPs in general have highly pleiotropic influences (Martin et al., 2019). We therefore sought to complement the causal relationship between miR-124 and clinical diagnoses with Mendelian randomization using several miR-124-associated SNPs as instruments, given that applying a relatively small number of instruments is still useful in drawing causal inference in many fields (Elliott et al., 2009; Haycock et al., 2017; Swerdlow et al., 2012; Swerdlow et al., 2015). However, further validation in a much larger cohort of subjects is awaited, in which more robust causality using a larger number of instruments can be tested. Nevertheless, our animal data sufficiently complement the human data by demonstrating the

causal impacts of miR-124 on behavioral dimensions relevant to SZ and BP (Monteggia et al., 2018).

Despite these caveats, however, our preclinical insights can be integrated into large-scale multi-institutional clinical studies whereby behavioral constructs and brain function studied in our animal model can be revisited in the context of miR-124, for which neuropsychology and brain imaging may be key readouts (Drysdales et al., 2017; Krystal and State, 2014). Furthermore, our findings on the miR-124-AMPA pathway may lead to the development of new drugs that target AMPARs at the level of pathophysiology, which may be more tractable than the level of pathogenesis, in particular for psychiatric conditions with complex genetic architectures and gene-environment interactions (Howe et al., 2018; Namkung et al., 2018). In the bigger picture, our new intellectual framework may open new avenues for the discovery of additional key biological pathways that provide mechanistic bridges between pathogenesis, pathophysiology, and clinical phenotypes for a wide range of neuropsychiatric conditions, hopefully invigorating drug development pipelines (Hall et al., 2015).



## **ACKNOWLEDGMENTS**

We thank Dr. Ingie Hong for insightful comments on the manuscript, and Dr. Kazuhiro Ishi for helpful advice on AAV generation. We also appreciate Dr. Benjamin Neale and Dr. Dongwon Lee for constructive comments on the genetic study. This work was supported by National Institutes of Mental Health Grants MH-092443 (to AS), MH-094268 (to AS), MH-105660 (to AS), and MH-107730 (to AS); foundation grants from Stanley, RUSK/S-R, and NARSAD/Brain and Behavior Research Foundation (to AS).

## **AUTHOR CONTRIBUTIONS**

H.N. and A.S. formulated the conceptual framework, designed experimental outlines, and wrote the manuscript. H.N. designed and conducted experiments. H.Y., D.F., B.J.L., S.L., S.K., A.S., K.S., H.J.P., and K.I. conducted experiments. P.Z. assisted genetic study. N.C. designed genetic analysis and helped conceptual framework formulation in genetic study. R.H. assisted conceptual framework formulation and experimental design in neurobiological study. A.S. supervised the overall project.

## **DECLARATION OF INTERESTS**

The authors declare no competing interests.

## REFERENCES

- Agarwal, V., Bell, G.W., Nam, J.W., and Bartel, D.P. (2015). Predicting effective microRNA target sites in mammalian mRNAs. *Elife* 4, e05005.
- Altshuler, D.M., Durbin, R.M., Abecasis, G.R., Bentley, D.R., Chakravarti, A., Clark, A.G., Donnelly, P., Eichler, E.E., Flicek, P., Gabriel, S.B., et al. (2015). A global reference for human genetic variation. *Nature* 526, 68-74.
- Arnold, S.E., Smutzer, G.S., Trojanowski, J.Q., and Moberg, P.J. (1998). Cellular and molecular neuropathology of the olfactory epithelium and central olfactory pathways in Alzheimer's disease and schizophrenia. *Ann N Y Acad Sci* 855, 762-775.
- Bartel, D.P. (2004). MicroRNAs: genomics, biogenesis, mechanism, and function. *Cell* 116, 281-297.
- Beveridge, N.J., Gardiner, E., Carroll, A.P., Tooney, P.A., and Cairns, M.J. (2010). Schizophrenia is associated with an increase in cortical microRNA biogenesis. *Mol Psychiatry* 15, 1176-1189.
- Borgmann-Winter, K.E., Wang, H.Y., Ray, R., Willis, B.R., Moberg, P.J., Rawson, N.E., Gur, R.E., Turetsky, B.I., and Hahn, C.G. (2016). Altered G Protein Coupling in Olfactory Neuroepithelial Cells From Patients With Schizophrenia. *Schizophr Bull* 42, 377-385.
- BrainSeq, A.H.B.G.C.E.a.d.l.o., and BrainSeq, A.H.B.G.C. (2015). BrainSeq: Neurogenomics to Drive Novel Target Discovery for Neuropsychiatric Disorders. *Neuron* 88, 1078-1083.
- Brown, S.P., and Hestrin, S. (2009). Intracortical circuits of pyramidal neurons reflect their long-range axonal targets. *Nature* 457, 1133-1136.
- Cheng, L.C., Pastrana, E., Tavazoie, M., and Doetsch, F. (2009). miR-124 regulates adult neurogenesis in the subventricular zone stem cell niche. *Nat Neurosci* 12, 399-408.

- Chi, S.W., Zang, J.B., Mele, A., and Darnell, R.B. (2009). Argonaute HITS-CLIP decodes microRNA-mRNA interaction maps. *Nature* 460, 479-486.
- Choi, V.W., Asokan, A., Haberman, R.A., and Samulski, R.J. (2007). Production of recombinant adeno-associated viral vectors for in vitro and in vivo use. *Curr Protoc Mol Biol* Chapter 16, Unit 16-25.
- Consortium, T.S.W.G.o.t.P.G., Ripke, S., Walters, J.T., and O'Donovan, M.C. (2020). Mapping genomic loci prioritises genes and implicates synaptic biology in schizophrenia. *medRxiv*, 2020.2009.2012.20192922.
- Cueva Vargas, J.L., Osswald, I.K., Unsain, N., Arousseau, M.R., Barker, P.A., Bowie, D., and Di Polo, A. (2015). Soluble Tumor Necrosis Factor Alpha Promotes Retinal Ganglion Cell Death in Glaucoma via Calcium-Permeable AMPA Receptor Activation. *J Neurosci* 35, 12088-12102.
- Das, S., Forer, L., Schonherr, S., Sidore, C., Locke, A.E., Kwong, A., Vrieze, S.I., Chew, E.Y., Levy, S., McGue, M., et al. (2016). Next-generation genotype imputation service and methods. *Nat Genet* 48, 1284-1287.
- Deng, J.V., Rodriguiz, R.M., Hutchinson, A.N., Kim, I.H., Wetsel, W.C., and West, A.E. (2010). MeCP2 in the nucleus accumbens contributes to neural and behavioral responses to psychostimulants. *Nat Neurosci* 13, 1128-1136.
- Do, K.Q., Trabesinger, A.H., Kirsten-Kruger, M., Lauer, C.J., Dydak, U., Hell, D., Holsboer, F., Boesiger, P., and Cuenod, M. (2000). Schizophrenia: glutathione deficit in cerebrospinal fluid and prefrontal cortex in vivo. *Eur J Neurosci* 12, 3721-3728.
- Doostparast Torshizi, A., Armoskus, C., Zhang, H., Forrest, M.P., Zhang, S., Souaiaia, T., Evgrafov, O.V., Knowles, J.A., Duan, J., and Wang, K. (2019). Deconvolution of transcriptional networks identifies TCF4 as a master regulator in schizophrenia. *Sci Adv* 5, eaau4139.

Drysdale, A.T., Grosenick, L., Downar, J., Dunlop, K., Mansouri, F., Meng, Y., Fetcho, R.N., Zebley, B., Oathes, D.J., Etkin, A., et al. (2017). Resting-state connectivity biomarkers define neurophysiological subtypes of depression. *Nat Med* 23, 28-38.

Eagles, N.J., Burke, E.E., Leonard, J., Barry, B.K., Stolz, J.M., Huuki, L., Phan, B.N., Serrato, V.L., Gutierrez-Millan, E., Aguilar-Ordonez, I., et al. (2021). SPEAQeasy: a scalable pipeline for expression analysis and quantification for R/bioconductor-powered RNA-seq analyses. *BMC Bioinformatics* 22, 224.

Elliott, P., Chambers, J.C., Zhang, W.H., Clarke, R., Hopewell, J.C., Peden, J.F., Erdmann, J., Braund, P., Engert, J.C., Bennett, D., et al. (2009). Genetic Loci Associated With C-Reactive Protein Levels and Risk of Coronary Heart Disease. *JAMA* 302, 37-48.

Ellison-Wright, I., and Bullmore, E.T. (2010). Anatomy of bipolar disorder and schizophrenia: A meta-analysis. *Schizophr Res* 117, 1-12.

Euesden, J., Lewis, C.M., and O'Reilly, P.F. (2015). PRSice: Polygenic Risk Score software. *Bioinformatics* 31, 1466-1468.

Evgrafov, O.V., Armoskus, C., Wrobel, B.B., Spitsyna, V.N., Souaiaia, T., Herstein, J.S., Walker, C.P., Nguyen, J.D., Camarena, A., Weitz, J.R., et al. (2020). Gene Expression in Patient-Derived Neural Progenitors Implicates WNT5A Signaling in the Etiology of Schizophrenia. *Biol Psychiatry* 88, 236-247.

Feron, F., Perry, C., McGrath, J.J., and Mackay-Sim, A. (1998). New techniques for biopsy and culture of human olfactory epithelial neurons. *Arch Otolaryngol Head Neck Surg* 124, 861-866.

Fromer, M., Roussos, P., Sieberts, S.K., Johnson, J.S., Kavanagh, D.H., Perumal, T.M., Ruderfer, D.M., Oh, E.C., Topol, A., Shah, H.R., et al. (2016). Gene expression elucidates functional impact of polygenic risk for schizophrenia. *Nat Neurosci* 19, 1442-1453.

- Gamo, N.J., and Sawa, A. (2014). Human stem cells and surrogate tissues for basic and translational study of mental disorders. *Biol Psychiatry* 75, 918-919.
- Gandal, M.J., Haney, J.R., Parikshak, N.N., Leppa, V., Ramaswami, G., Hartl, C., Schork, A.J., Appadurai, V., Buil, A., Werge, T.M., et al. (2018). Shared molecular neuropathology across major psychiatric disorders parallels polygenic overlap. *Science* 359, 693-697.
- Gandal, M.J., Leppa, V., Won, H., Parikshak, N.N., and Geschwind, D.H. (2016). The road to precision psychiatry: translating genetics into disease mechanisms. *Nat Neurosci* 19, 1397-1407.
- Gascon, E., Lynch, K., Ruan, H., Almeida, S., Verheyden, J.M., Seeley, W.W., Dickson, D.W., Petrucelli, L., Sun, D., Jiao, J., et al. (2014). Alterations in microRNA-124 and AMPA receptors contribute to social behavioral deficits in frontotemporal dementia. *Nat Med* 20, 1444-1451.
- Geschwind, D.H., and Flint, J. (2015). Genetics and genomics of psychiatric disease. *Science* 349, 1489-1494.
- Gu, Y., Chiu, S.L., Liu, B., Wu, P.H., Delannoy, M., Lin, D.T., Wirtz, D., and Haganir, R.L. (2016). Differential vesicular sorting of AMPA and GABAA receptors. *Proc Natl Acad Sci U S A* 113, E922-931.
- Hahn, C.G., Gomez, G., Restrepo, D., Friedman, E., Josiassen, R., Pribitkin, E.A., Lowry, L.D., Gallop, R.J., and Rawson, N.E. (2005). Aberrant intracellular calcium signaling in olfactory neurons from patients with bipolar disorder. *Am J Psychiatry* 162, 616-618.
- Hall, J., Trent, S., Thomas, K.L., O'Donovan, M.C., and Owen, M.J. (2015). Genetic risk for schizophrenia: convergence on synaptic pathways involved in plasticity. *Biol Psychiatry* 77, 52-58.

Hampel, H., Teipel, S.J., Fuchsberger, T., Andreasen, N., Wiltfang, J., Otto, M., Shen, Y., Dodel, R., Du, Y., Farlow, M., et al. (2004). Value of CSF beta-amyloid1-42 and tau as predictors of Alzheimer's disease in patients with mild cognitive impairment. *Mol Psychiatry* 9, 705-710.

Haycock, P.C., Burgess, S., Nounu, A., Zheng, J., Okoli, G.N., Bowden, J., Wade, K.H., Timpson, N.J., Evans, D.M., Willeit, P., et al. (2017). Association Between Telomere Length and Risk of Cancer and Non-Neoplastic Diseases A Mendelian Randomization Study. *JAMA Oncol* 3, 636-651.

He, L., and Hannon, G.J. (2004). MicroRNAs: small RNAs with a big role in gene regulation. *Nat Rev Genet* 5, 522-531.

Heilbronner, S.R., Rodriguez-Romaguera, J., Quirk, G.J., Groenewegen, H.J., and Haber, S.N. (2016). Circuit-Based Corticostriatal Homologies Between Rat and Primate. *Biol Psychiatry* 80, 509-521.

Hemani, G., Zheng, J., Elsworth, B., Wade, K.H., Haberland, V., Baird, D., Laurin, C., Burgess, S., Bowden, J., Langdon, R., et al. (2018). The MR-Base platform supports systematic causal inference across the human phenome. *Elife* 7, e34408.

Henley, J.M., and Wilkinson, K.A. (2016). Synaptic AMPA receptor composition in development, plasticity and disease. *Nat Rev Neurosci* 17, 337-350.

Ho, V.M., Dallalzadeh, L.O., Karathanasis, N., Keles, M.F., Vangala, S., Grogan, T., Poirazi, P., and Martin, K.C. (2014). GluA2 mRNA distribution and regulation by miR-124 in hippocampal neurons. *Mol Cell Neurosci* 61, 1-12.

Hoover, W.B., and Vertes, R.P. (2007). Anatomical analysis of afferent projections to the medial prefrontal cortex in the rat. *Brain Struct Funct* 212, 149-179.

Hou, Q.M., Ruan, H.Y., Gilbert, J., Wang, G., Ma, Q., Yao, W.D., and Man, H.Y. (2015). MicroRNA miR124 is required for the expression of homeostatic synaptic plasticity. *Nat Commun* 6, 1-12

Howe, J.R., Bear, M.F., Golshani, P., Klann, E., Lipton, S.A., Mucke, L., Sahin, M., and Silva, A.J. (2018). The mouse as a model for neuropsychiatric drug development. *Curr Biol* 28, R909-R914.

Howie, B., Fuchsberger, C., Stephens, M., Marchini, J., and Abecasis, G.R. (2012). Fast and accurate genotype imputation in genome-wide association studies through pre-phasing. *Nat Genet* 44, 955-959.

Hsu, S.D., Lin, F.M., Wu, W.Y., Liang, C., Huang, W.C., Chan, W.L., Tsai, W.T., Chen, G.Z., Lee, C.J., Chiu, C.M., et al. (2011). miRTarBase: a database curates experimentally validated microRNA-target interactions. *Nucleic Acids Res* 39, D163-169.

Hunninghake, G.W., Zimmerman, M.B., Schwartz, D.A., King, T.E., Jr., Lynch, J., Hegele, R., Waldron, J., Colby, T., Muller, N., Lynch, D., et al. (2001). Utility of a lung biopsy for the diagnosis of idiopathic pulmonary fibrosis. *Am J Respir Crit Care Med* 164, 193-196.

Iacobellis, G., and Bianco, A.C. (2011). Epicardial adipose tissue: emerging physiological, pathophysiological and clinical features. *Trends Endocrinol Metab* 22, 450-457.

Jack, C.R., Jr., Wiste, H.J., Vemuri, P., Weigand, S.D., Senjem, M.L., Zeng, G., Bernstein, M.A., Gunter, J.L., Pankratz, V.S., Aisen, P.S., et al. (2010). Brain beta-amyloid measures and magnetic resonance imaging atrophy both predict time-to-progression from mild cognitive impairment to Alzheimer's disease. *Brain* 133, 3336-3348.

Jaffe, A.E., Straub, R.E., Shin, J.H., Tao, R., Gao, Y., Collado-Torres, L., Kam-Thong, T., Xi, H.S., Quan, J., Chen, Q., et al. (2018). Developmental and genetic regulation of the human cortex transcriptome illuminate schizophrenia pathogenesis. *Nat Neurosci* 21, 1117-1125.

Jeggari, A., Marks, D.S., and Larsson, E. (2012). miRcode: a map of putative microRNA target sites in the long non-coding transcriptome. *Bioinformatics* 28, 2062-2063.

Jovicic, A., Roshan, R., Moiso, N., Pradervand, S., Moser, R., Pillai, B., and Luthi-Carter, R. (2013). Comprehensive expression analyses of neural cell-type-specific miRNAs identify new determinants of the specification and maintenance of neuronal phenotypes. *J Neurosci* 33, 5127-5137.

Kano, S., Colantuoni, C., Han, F., Zhou, Z., Yuan, Q., Wilson, A., Takayanagi, Y., Lee, Y., Rapoport, J., Eaton, W., et al. (2013). Genome-wide profiling of multiple histone methylations in olfactory cells: further implications for cellular susceptibility to oxidative stress in schizophrenia. *Mol Psychiatry* 18, 740-742.

Kim, A.H., Reimers, M., Mahera, B., Williamson, V., McMichael, O.I., McClay, J.L., van den Oord, E.J.C.G., Riley, B.P., Kendler, K.S., and Vladimirov, V.I. (2010). MicroRNA expression profiling in the prefrontal cortex of individuals affected with schizophrenia and bipolar disorders. *Schizophr Res* 124, 183-191.

Konopaske, G.T., Lange, N., Coyle, J.T., and Benes, F.M. (2014). Prefrontal Cortical Dendritic Spine Pathology in Schizophrenia and Bipolar Disorder. *JAMA Psychiatry* 71, 1323-1331.

Krichevsky, A.M., King, K.S., Donahue, C.P., Khrapko, K., and Kosik, K.S. (2003). A microRNA array reveals extensive regulation of microRNAs during brain development. *RNA* 9, 1274-1281.



Krystal, J.H., and State, M.W. (2014). Psychiatric Disorders: Diagnosis to Therapy. *Cell* 157, 201-214.

Lagos-Quintana, M., Rauhut, R., Yalcin, A., Meyer, J., Lendeckel, W., and Tuschl, T. (2002). Identification of tissue-specific microRNAs from mouse. *Curr Biol* 12, 735-739.

Laubach, M., Amarante, L.M., Swanson, K., and White, S.R. (2018). What, If Anything, Is Rodent Prefrontal Cortex? *eNeuro* 5, e0315-0318

Lavoie, J., Astorga, P.G., Segal-Gavish, H., Wu, Y.C., Chung, Y.J., Cascella, N.G., Sawa, A., and Ishizuka, K. (2017). The Olfactory Neural Epithelium As a Tool in Neuroscience. *Trends Mol Med* 23, 100-103.

Lee SH, R.S., Neale BM, Faraone SV, Purcell SM, Perlis RH, Mowry BJ, Thapar A, Goddard ME, Witte JS, Absher D, Agartz I, Akil H, Amin F, Andreassen OA, Anjorin A, Anney R, Anttila V, Arking DE, Asherson P, Azevedo MH, Backlund L, Badner JA, Bailey AJ, Banaschewski T, Barchas JD, Barnes MR, Barrett TB, Bass N, Battaglia A, Bauer M, Bayés M, Bellivier F, Bergen SE, Berrettini W, Betancur C, Bettecken T, Biederman J, Binder EB, Black DW, Blackwood DH, Bloss CS, Boehnke M, Boomsma DI, Breen G, Breuer R, Bruggeman R, Cormican P, Buccola NG, Buitelaar JK, Bunney WE, Buxbaum JD, Byerley WF, Byrne EM, Caesar S, Cahn W, Cantor RM, Casas M, Chakravarti A, Chambert K, Choudhury K, Cichon S, Cloninger CR, Collier DA, Cook EH, Coon H, Cormand B, Corvin A, Coryell WH, Craig DW, Craig IW, Crosbie J, Cuccaro ML, Curtis D, Czamara D, Datta S, Dawson G, Day R, De Geus EJ, Degenhardt F, Djurovic S, Donohoe GJ, Doyle AE, Duan J, Dudbridge F, Duketis E, Ebsstein RP, Edenberg HJ, Elia J, Ennis S, Etain B, Fanous A, Farmer AE, Ferrier IN, Flickinger M, Fombonne E, Foroud T, Frank J, Franke B, Fraser C, Freedman R, Freimer NB, Freitag CM, Friedl M, Frisé L, Gallagher L, Gejman PV, Georgieva L, Gershon ES, Geschwind DH,

Giegling I, Gill M, Gordon SD, Gordon-Smith K, Green EK, Greenwood TA, Grice DE, Gross M, Grozeva D, Guan W, Gurling H, De Haan L, Haines JL, Hakonarson H, Hallmayer J, Hamilton SP, Hamshere ML, Hansen TF, Hartmann AM, Hautzinger M, Heath AC, Henders AK, Herms S, Hickie IB, Hipolito M, Hoefels S, Holmans PA, Holsboer F, Hoogendijk WJ, Hottenga JJ, Hultman CM, Hus V, Ingason A, Ising M, Jamain S, Jones EG, Jones I, Jones L, Tzeng JY, Kähler AK, Kahn RS, Kandaswamy R, Keller MC, Kennedy JL, Kenny E, Kent L, Kim Y, Kirov GK, Klauck SM, Klei L, Knowles JA, Kohli MA, Koller DL, Konte B, Korszun A, Krabbendam L, Krasucki R, Kuntsi J, Kwan P, Landén M, Långström N, Lathrop M, Lawrence J, Lawson WB, Leboyer M, Ledbetter DH, Lee PH, Lencz T, Lesch KP, Levinson DF, Lewis CM, Li J, Lichtenstein P, Lieberman JA, Lin DY, Linszen DH, Liu C, Lohoff FW, Loo SK, Lord C, Lowe JK, Lucae S, MacIntyre DJ, Madden PA, Maestrini E, Magnusson PK, Mahon PB, Maier W, Malhotra AK, Mane SM, Martin CL, Martin NG, Mattheisen M, Matthews K, Mattingsdal M, McCarroll SA, McGhee KA, McGough JJ, McGrath PJ, McGuffin P, McInnis MG, McIntosh A, McKinney R, McLean AW, McMahan FJ, McMahan WM, McQuillin A, Medeiros H, Medland SE, Meier S, Melle I, Meng F, Meyer J, Middeldorp CM, Middleton L, Milanova V, Miranda A, Monaco AP, Montgomery GW, Moran JL, Moreno-De-Luca D, Morken G, Morris DW, Morrow EM, Moskvina V, Muglia P, Mühleisen TW, Muir WJ, Müller-Myhsok B, Murtha M, Myers RM, Myin-Germeys I, Neale MC, Nelson SF, Nievergelt CM, Nikolov I, Nimgaonkar V, Nolen WA, Nöthen MM, Nurnberger JI, Nwulia EA, Nyholt DR, O'Dushlaine C, Oades RD, Olincy A, Oliveira G, Olsen L, Ophoff RA, Osby U, Owen MJ, Palotie A, Parr JR, Paterson AD, Pato CN, Pato MT, Penninx BW, Pergadia ML, Pericak-Vance MA, Pickard BS, Pimm J, Piven J, Posthuma D, Potash JB, Poustka F, Propping P, Puri V, Quedstedt DJ, Quinn EM, Ramos-Quiroga JA, Rasmussen HB, Raychaudhuri S, Rehnström K,

Reif A, Ribasés M, Rice JP, Rietschel M, Roeder K, Roeyers H, Rossin L, Rothenberger A, Rouleau G, Ruderfer D, Rujescu D, Sanders AR, Sanders SJ, Santangelo SL, Sergeant JA, Schachar R, Schalling M, Schatzberg AF, Scheftner WA, Schellenberg GD, Scherer SW, Schork NJ, Schulze TG, Schumacher J, Schwarz M, Scolnick E, Scott LJ, Shi J, Shilling PD, Shyn SI, Silverman JM, Slager SL, Smalley SL, Smit JH, Smith EN, Sonuga-Barke EJ, St Clair D, State M, Steffens M, Steinhausen HC, Strauss JS, Strohmaier J, Stroup TS, Sutcliffe JS, Szatmari P, Szelinger S, Thirumalai S, Thompson RC, Todorov AA, Tozzi F, Treutlein J, Uhr M, van den Oord EJ, Van Grootheest G, Van Os J, Vicente AM, Vieland VJ, Vincent JB, Visscher PM, Walsh CA, Wassink TH, Watson SJ, Weissman MM, Werge T, Wienker TF, Wijsman EM, Willemsen G, Williams N, Willsey AJ, Witt SH, Xu W, Young AH, Yu TW, Zammit S, Zandi PP, Zhang P, Zitman FG, Zöllner S, Devlin B, Kelsoe JR, Sklar P, Daly MJ, O'Donovan MC, Craddock N, Sullivan PF, Smoller JW, Kendler KS, Wray NR (2013). Identification of risk loci with shared effects on five major psychiatric disorders: a genome-wide analysis. *Lancet* 381, 1371-1379.

Lieberman, J.A., Kane, J.M., and Alvir, J. (1987). Provocative Tests with Psychostimulant Drugs in Schizophrenia. *Psychopharmacology* 91, 415-433.

Lipska, B.K., Deep-Soboslay, A., Weickert, C.S., Hyde, T.M., Martin, C.E., Herman, M.M., and Kleinman, J.E. (2006). Critical factors in gene expression in postmortem human brain: Focus on studies in schizophrenia. *Biol Psychiatry* 60, 650-658.

Liu, S.H., Lau, L., Wei, J.S., Zhu, D.Y., Zou, S.W., Sun, H.S., Fu, Y.P., Liu, F., and Lu, Y.M. (2004). Expression of Ca<sup>2+</sup>-Permeable AMPA receptor channels primes cell death in transient forebrain ischemia. *Neuron* 43, 43-55.

Livak, K.J., and Schmittgen, T.D. (2001). Analysis of relative gene expression data using real-time quantitative PCR and the  $2^{-\Delta\Delta C_T}$  method. *Methods* 25, 402-408.

Loh, P.R., Danecek, P., Palamara, P.F., Fuchsberger, C., Reshef, Y.A., Finucane, H.K., Schoenherr, S., Forer, L., McCarthy, S., Abecasis, G.R., et al. (2016). Reference-based phasing using the Haplotype Reference Consortium panel. *Nat Genet* 48, 1443-1448.

Mackay-Sim, A. (2012). Concise review: Patient-derived olfactory stem cells: new models for brain diseases. *Stem Cells* 30, 2361-2365.

MacKinnon, D.P., Fairchild, A.J., and Fritz, M.S. (2007). Mediation analysis. *Annu Rev Psychol* 58, 593-614.

Mancuso, F., Horan, W.P., Kern, R.S., and Green, M.F. (2011). Social cognition in psychosis: Multidimensional structure, clinical correlates, and relationship with functional outcome. *Schizophr Res* 125, 143-151.

Martin, A.R., Daly, M.J., Robinson, E.B., Hyman, S.E., and Neale, B.M. (2019). Predicting Polygenic Risk of Psychiatric Disorders. *Biol Psychiatry* 86, 97-109.

Mattie, M.D., Benz, C.C., Bowers, J., Sensinger, K., Wong, L., Scott, G.K., Fedele, V., Ginzinger, D., Getts, R., and Haqq, C. (2006). Optimized high-throughput microRNA expression profiling provides novel biomarker assessment of clinical prostate and breast cancer biopsies. *Mol Cancer* 5, 24.

Monteggia, L.M., Heimer, H., and Nestler, E.J. (2018). Meeting Report: Can We Make Animal Models of Human Mental Illness? *Biol Psychiatry* 84, 542-545.

Mullins, N., Forstner, A.J., O'Connell, K.S., Coombes, B., Coleman, J.R.I., Qiao, Z., Als, T.D., Bigdeli, T.B., Børte, S., Bryois, J., et al. (2021). Genome-wide association study of more than

40,000 bipolar disorder cases provides new insights into the underlying biology. *Nat Genet* 53, 817-829.

Murugan, M., Jang, H.J., Park, M., Miller, E.M., Cox, J., Taliaferro, J.P., Parker, N.F., Bhave, V., Hur, H., Liang, Y.P., et al. (2017). Combined Social and Spatial Coding in a Descending Projection from the Prefrontal Cortex. *Cell* 171, 1663-1677.

Namkung, H., Lee, B.J., and Sawa, A. (2018). Causal Inference on Pathophysiological Mediators in Psychiatry. *Cold Spring Harb Symp Quant Biol* 83, 17-23.

O'Donovan, M.C., and Owen, M.J. (2016). The implications of the shared genetics of psychiatric disorders. *Nat Med* 22, 1214-1219.

Paraskevopoulou, M.D., Georgakilas, G., Kostoulas, N., Vlachos, I.S., Vergoulis, T., Reczko, M., Filippidis, C., Dalamagas, T., and Hatzigeorgiou, A.G. (2013). DIANA-microT web server v5.0: service integration into miRNA functional analysis workflows. *Nucleic Acids Res* 41, W169-173.

Pearlson, G.D. (2015). Etiologic, phenomenologic, and endophenotypic overlap of schizophrenia and bipolar disorder. *Annu Rev Clin Psychol* 11, 251-281.

Pers, T.H., Timshel, P., and Hirschhorn, J.N. (2015). SNPsnap: a Web-based tool for identification and annotation of matched SNPs. *Bioinformatics* 31, 418-420.

Purcell, S.M., Wray, N.R., Stone, J.L., Visscher, P.M., O'Donovan, M.C., Sullivan, P.F., Sklar, P., Ruderfer, D.M., McQuillin, A., Morris, D.W., et al. (2009). Common polygenic variation contributes to risk of schizophrenia and bipolar disorder. *Nature* 460, 748-752.

Rajasethupathy, P., Fiumara, F., Sheridan, R., Betel, D., Puthanveetil, S.V., Russo, J.J., Sander, C., Tuschl, T., and Kandel, E. (2009). Characterization of small RNAs in *Aplysia* reveals a role for miR-124 in constraining synaptic plasticity through CREB. *Neuron* 63, 803-817.

Rhie, S.K., Schreiner, S., Witt, H., Armoskus, C., Lay, F.D., Camarena, A., Spitsyna, V.N., Guo, Y., Berman, B.P., Evgrafov, O.V., et al. (2018). Using 3D epigenomic maps of primary olfactory neuronal cells from living individuals to understand gene regulation. *Sci Adv* 4, eaav8550.

Rockey, D.C., Caldwell, S.H., Goodman, Z.D., Nelson, R.C., Smith, A.D., and American Association for the Study of Liver, D. (2009). Liver biopsy. *Hepatology* 49, 1017-1044.

Ruderfer, D.M., Ripke, S., McQuillin, A., Boocock, J., Stahl, E.A., Pavlides, J.M.W., Mullins, N., Charney, A.W., Ori, A.P.S., Loohuis, L.M.O., et al. (2018). Genomic Dissection of Bipolar Disorder and Schizophrenia, Including 28 Subphenotypes. *Cell* 173, 1705-1715 e1716.

Santarelli, D.M., Beveridge, N.J., Tooney, P.A., and Cairns, M.J. (2011). Upregulation of dicer and microRNA expression in the dorsolateral prefrontal cortex Brodmann area 46 in schizophrenia. *Biol Psychiatry* 69, 180-187.

Sanuki, R., Onishi, A., Koike, C., Muramatsu, R., Watanabe, S., Muranishi, Y., Irie, S., Uneo, S., Koyasu, T., Matsui, R., et al. (2011). miR-124a is required for hippocampal axogenesis and retinal cone survival through Lhx2 suppression. *Nat Neurosci* 14, 1125-1134.

Sawamura, N., Sawamura-Yamamoto, T., Ozeki, Y., Ross, C.A., and Sawa, A. (2005). A form of DISC1 enriched in nucleus: Altered subcellular distribution in orbitofrontal cortex in psychosis and substance/alcohol abuse. *Proc Natl Acad Sci U S A* 102, 1187-1192.

Saxena, A., Wagatsuma, A., Noro, Y., Kuji, T., Asaka-Oba, A., Watahiki, A., Gurnot, C., Fagiolini, M., Hensch, T.K., and Carninci, P. (2012). Trehalose-enhanced isolation of neuronal sub-types from adult mouse brain. *Biotechniques* 52, 381-385.

Shabalin, A.A. (2012). Matrix eQTL: ultra fast eQTL analysis via large matrix operations. *Bioinformatics* 28, 1353-1358.

Shao, L., and Vawter, M.P. (2008). Shared gene expression alterations in schizophrenia and bipolar disorder. *Biol Psychiatry* 64, 89-97.

Siegert, S., Seo, J., Kwon, E.J., Rudenko, A., Cho, S., Wang, W.Y., Flood, Z., Martorell, A.J., Ericsson, M., Mungenast, A.E., et al. (2015). The schizophrenia risk gene product miR-137 alters presynaptic plasticity. *Nat Neurosci* 18, 1008-1016.

Siravegna, G., Marsoni, S., Siena, S., and Bardelli, A. (2017). Integrating liquid biopsies into the management of cancer. *Nat Rev Clin Oncol* 14, 531-548.

Spruston, N. (2008). Pyramidal neurons: dendritic structure and synaptic integration. *Nat Rev Neurosci* 9, 206-221.

Studniarczyk, D., Coombs, I., Cull-Candy, S.G., and Farrant, M. (2013). TARP gamma-7 selectively enhances synaptic expression of calcium-permeable AMPARs. *Nat Neurosci* 16, 1266-1274.

Swerdlow, D.I., Holmes, M.V., Kuchenbaecker, K.B., Engmann, J.E.L., Shah, T., Sofat, R., Guo, Y.R., Chung, C., Peasey, A., Ster, R.P., et al. (2012). The interleukin-6 receptor as a target for prevention of coronary heart disease: a mendelian randomisation analysis. *Lancet* 379, 1214-1224.

Swerdlow, D.I., Preiss, D., Kuchenbaecker, K.B., Holmes, M.V., Engmann, J.E.L., Shah, T., Sofat, R., Stender, S., Johnson, P.C.D., Scott, R.A., et al. (2015). HMG-coenzyme A reductase inhibition, type 2 diabetes, and bodyweight: evidence from genetic analysis and randomised trials. *Lancet* 385, 351-361.

Tingley, D., Yamamoto, T., Hirose, K., Keele, L., and Imai, K. (2014). mediation: R Package for Causal Mediation Analysis. *J Stat Softw* 59.

- Torrey, E.F., Webster, M., Knable, M., Johnston, N., and Yolken, R.H. (2000). The stanley foundation brain collection and neuropathology consortium. *Schizophr Res* 44, 151-155.
- VanderWeele, T.J. (2016). Mediation Analysis: A Practitioner's Guide. *Annu Rev Public Health* 37, 17-32.
- Wang, X., Liu, D., Huang, H.Z., Wang, Z.H., Hou, T.Y., Yang, X., Pang, P., Wei, N., Zhou, Y.F., Dupras, M.J., et al. (2018). A Novel MicroRNA-124/PTPN1 Signal Pathway Mediates Synaptic and Memory Deficits in Alzheimer's Disease. *Biol Psychiatry* 83, 395-405.
- Wilson, C.L., and Miller, C.J. (2005). Simpleaffy: a BioConductor package for Affymetrix Quality Control and data analysis. *Bioinformatics* 21, 3683-3685.
- Wise, S.P. (2008). Forward frontal fields: phylogeny and fundamental function. *Trends Neurosci* 31, 599-608.
- Yang, K., and Sawa, A. (2017). Open Sesame: Open Chromatin Regions Shed Light onto Non-coding Risk Variants. *Cell Stem Cell* 21, 285-287.
- Yoo, A.S., Sun, A.X., Li, L., Shcheglovitov, A., Portmann, T., Li, Y., Lee-Messer, C., Dolmetsch, R.E., Tsien, R.W., and Crabtree, G.R. (2011). MicroRNA-mediated conversion of human fibroblasts to neurons. *Nature* 476, 228-231.



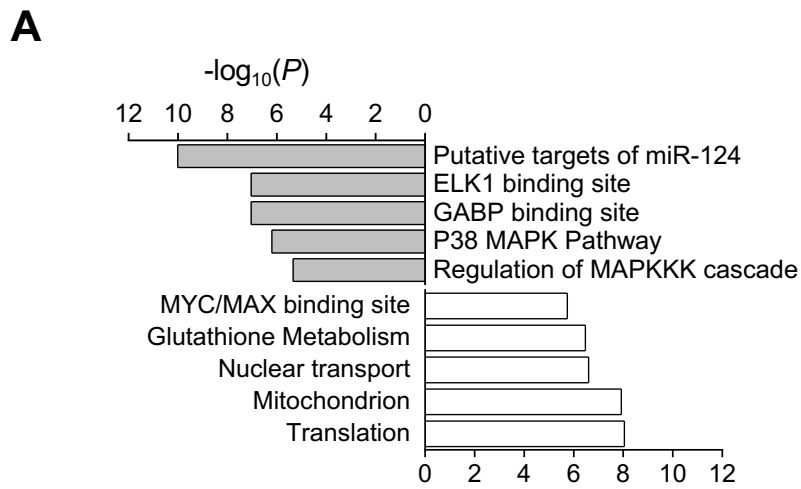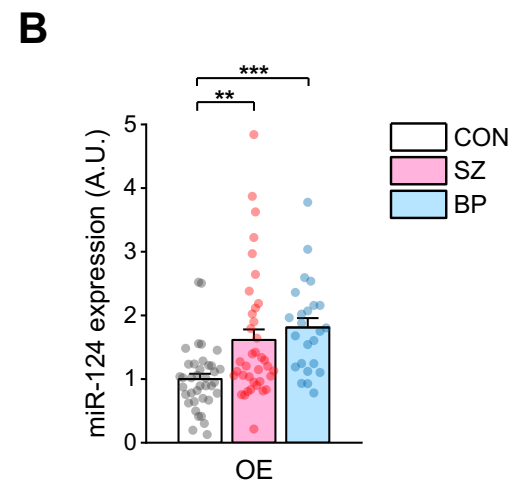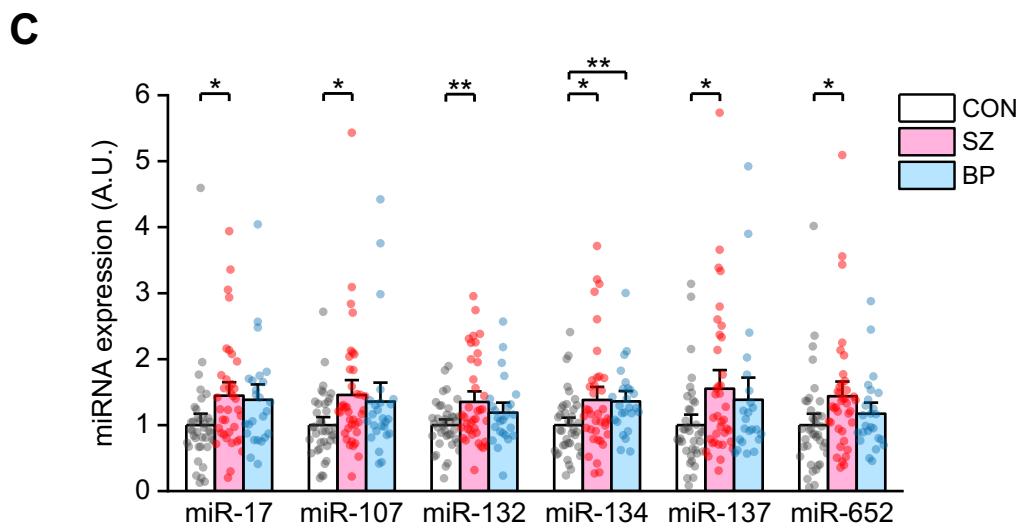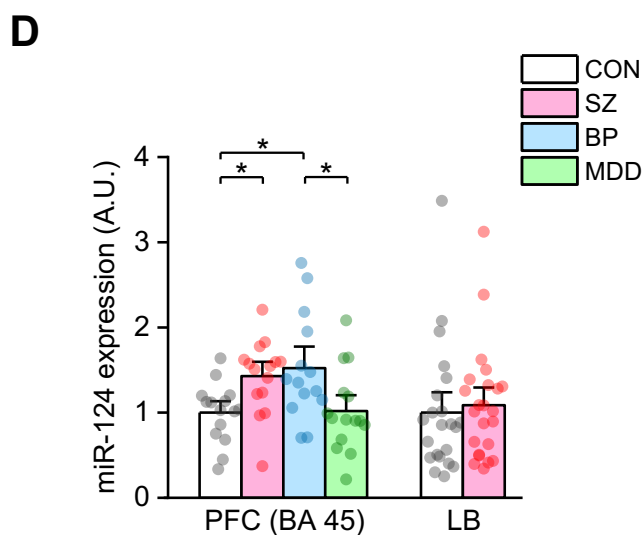

**Figure 1. MiR-124 is significantly upregulated in biopsied neuronal cells and the postmortem prefrontal cortex (PFC) from patients with schizophrenia (SZ) and those with bipolar disorder (BP).** (A) Pathway enrichment analysis found that putative targets of miR-124 were significantly downregulated in olfactory epithelium (OE)-derived neuronal cells (olfactory neuronal cells) from patients with SZ, implying upregulation of miR-124. (B) Upregulation of miR-124 was validated by quantitative real-time polymerase chain reaction (qRT-PCR) in olfactory neuronal cells from SZ and BP patients, compared to healthy controls (CON) ( $N_{CON}=38$ ,  $N_{SZ}=37$ ,  $N_{BP}=24$ ; Welch's ANOVA,  $F_{2,52.335}=14.100$ ,  $p=1.3 \times 10^{-5}$ ; *post hoc* Games-Howell test). (C) Alterations of miR-17, -107, -132, -134, -137, and -652 were detected in olfactory neuronal cells from SZ and/or BP patients. miR-17 ( $N_{CON}=39$ ,  $N_{SZ}=37$ ,  $N_{BP}=25$ ; one-way ANOVA,  $F_{2,98}=3.246$ ,  $p=0.043$ ; *post hoc* Tukey's HSD test). miR-107 ( $N_{CON}=38$ ,  $N_{SZ}=38$ ,  $N_{BP}=25$ ; one-way ANOVA,  $F_{2,98}=3.393$ ,  $p=0.038$ ; *post hoc* Tukey's HSD test). miR-132 ( $N_{CON}=39$ ,  $N_{SZ}=38$ ,  $N_{BP}=25$ ; Welch's ANOVA,  $F_{2,55.228}=4.552$ ,  $p=0.015$ ; *post hoc* Games-Howell test). miR-134 ( $N_{CON}=39$ ,  $N_{SZ}=38$ ,  $N_{BP}=25$ ; Welch's ANOVA,  $F_{2,59.049}=5.428$ ,  $p=0.007$ ; *post hoc* Games-Howell test). miR-137 ( $N_{CON}=38$ ,  $N_{SZ}=37$ ,  $N_{BP}=23$ ; Welch's ANOVA,  $F_{2,49.415}=3.811$ ,  $p=0.029$ ; *post hoc* Games-Howell test). miR-652 ( $N_{CON}=39$ ,  $N_{SZ}=38$ ,  $N_{BP}=25$ ; one-way ANOVA,  $F_{2,99}=3.117$ ,  $p=0.049$ ; *post hoc* Tukey's HSD test). (D) MiR-124 was also found to be upregulated in a sub-region (BA 45) of the PFC from both SZ and BP (but not MDD) patients, compared to that from CON ( $N_{CON}=15$ ,  $N_{SZ}=15$ ,  $N_{BP}=14$ ,  $N_{MDD}=15$ ; one-way ANOVA,  $F_{3,58}=4.695$ ,  $p=0.005$ ; *post hoc* Tukey's HSD test). However, no alteration was detected in lymphoblasts (LB) from SZ, compared to those from CON ( $N_{CON}=22$ ,  $N_{SZ}=23$ ; two-tailed Student's *t*-test,  $t_{43}=-0.415$ ,  $p=0.754$ ). Bar graph expressed as mean  $\pm$  SEM. \* $p < 0.05$ , \*\* $p < 0.01$ , \*\*\* $p < 0.001$ . More detailed statistical information is in **Table S2**.

**A**

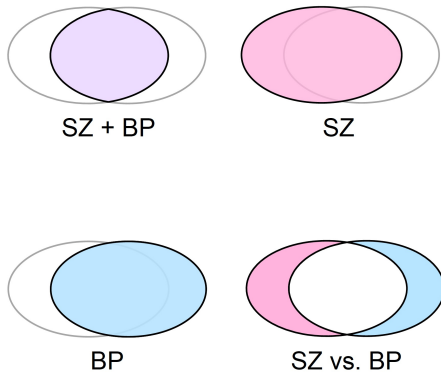

**B**

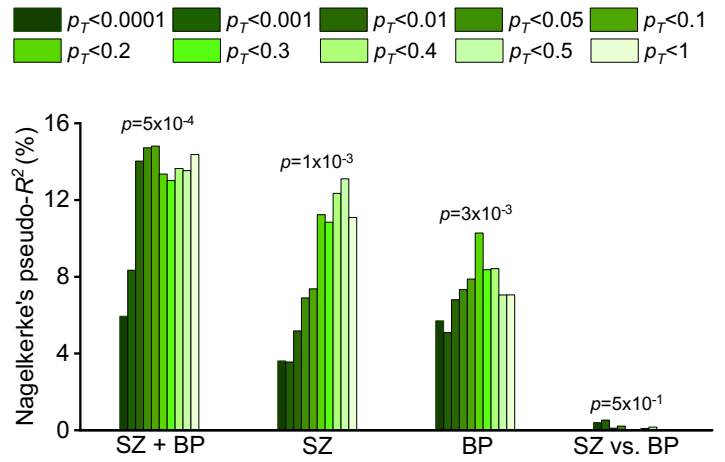

**C**

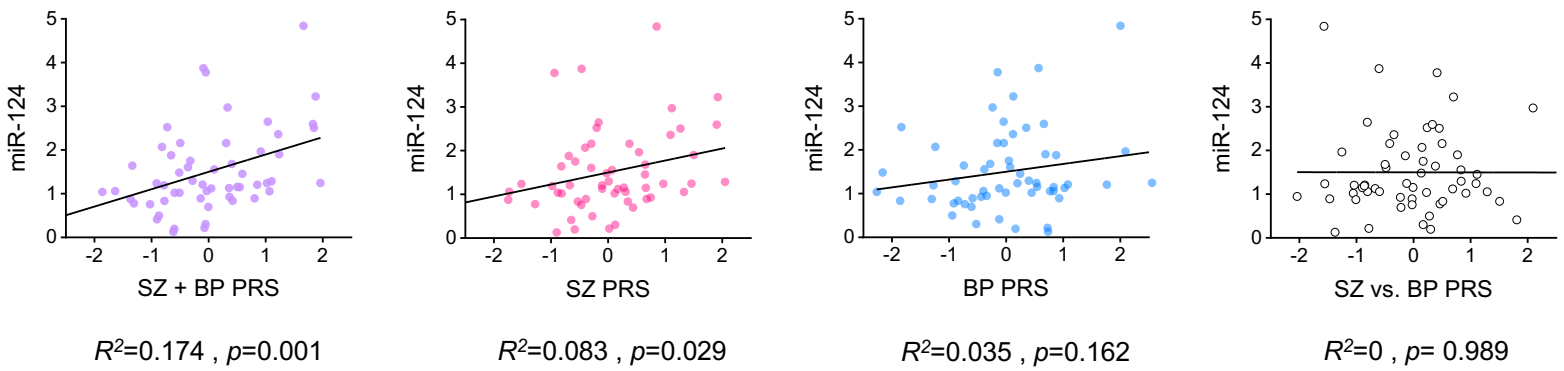

**D**

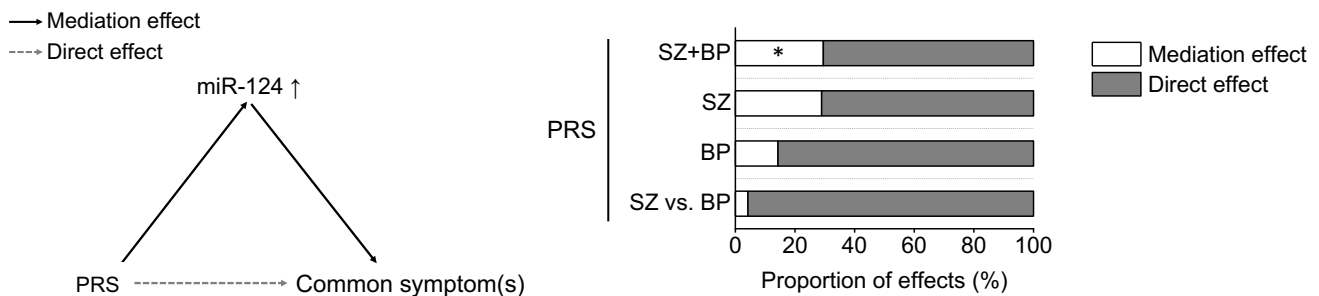

**E**

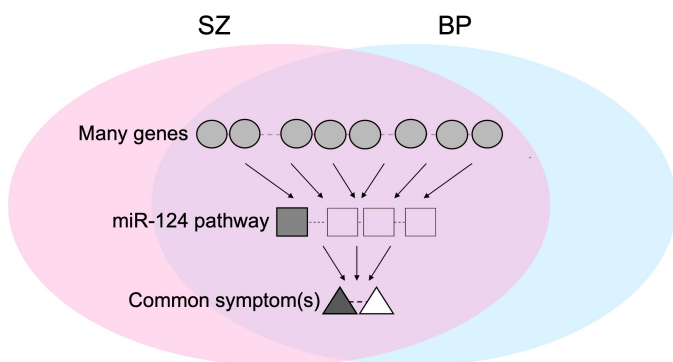

**Figure 2. MiR-124 serves as a key mediator linking the polygenetic risks shared between SZ and BP to common clinical feature(s) that can exist in both SZ and BP.** (A) Genome-wide polygenic risk scores (PRSs) for SZ+BP, SZ, BP, SZ vs. BP were calculated in our independent samples of European ancestry to address shared or disease-specific polygenic contributions to phenotypic feature(s) that can commonly exist in SZ and BP. (B) Case-control status (either SZ or BP vs. CON) is best predicted by SZ+BP PRSs, and also well predicted by SZ PRSs or BP PRSs, which is in contrast to poor prediction by SZ vs. BP PRSs ( $N_{CON}=45$ ,  $N_{SZ+BP}=63$ ; logistic regression analysis). (C) Both SZ+BP and SZ PRSs significantly predict miR-124 expression, accounting for 17.4% and 8.3% of the variance of miR-124 expression, respectively, at the  $p$ -value thresholds where the PRSs best account for the diagnosis of either SZ or BP. However, PRSs for BP and SZ vs. BP do not predict miR-124 expression significantly, accounting only for 3.5% and 0% of the variance of miR-124 expression, respectively ( $N=57$ ; linear regression analysis). (D) MiR-124 functions as an important mediator between the shared polygenic contributions and the diagnosis of either SZ or BP. SZ+BP PRSs ( $N=57$ ; mediation analysis using a bootstrapping method with 5,000 iterations, proportion mediated (%) = 30.7, 95% CI [0.0096, 1.44],  $p=0.042$ ). (E) This schematic illustrates that polygenic risks shared between SZ and BP converge onto dysregulation of miR-124 in the common pathophysiology that may in turn contribute to clinical feature(s) commonly observed in SZ and BP, such as psychosis.  $*p < 0.05$ . More detailed statistical information is in **Table S2**.

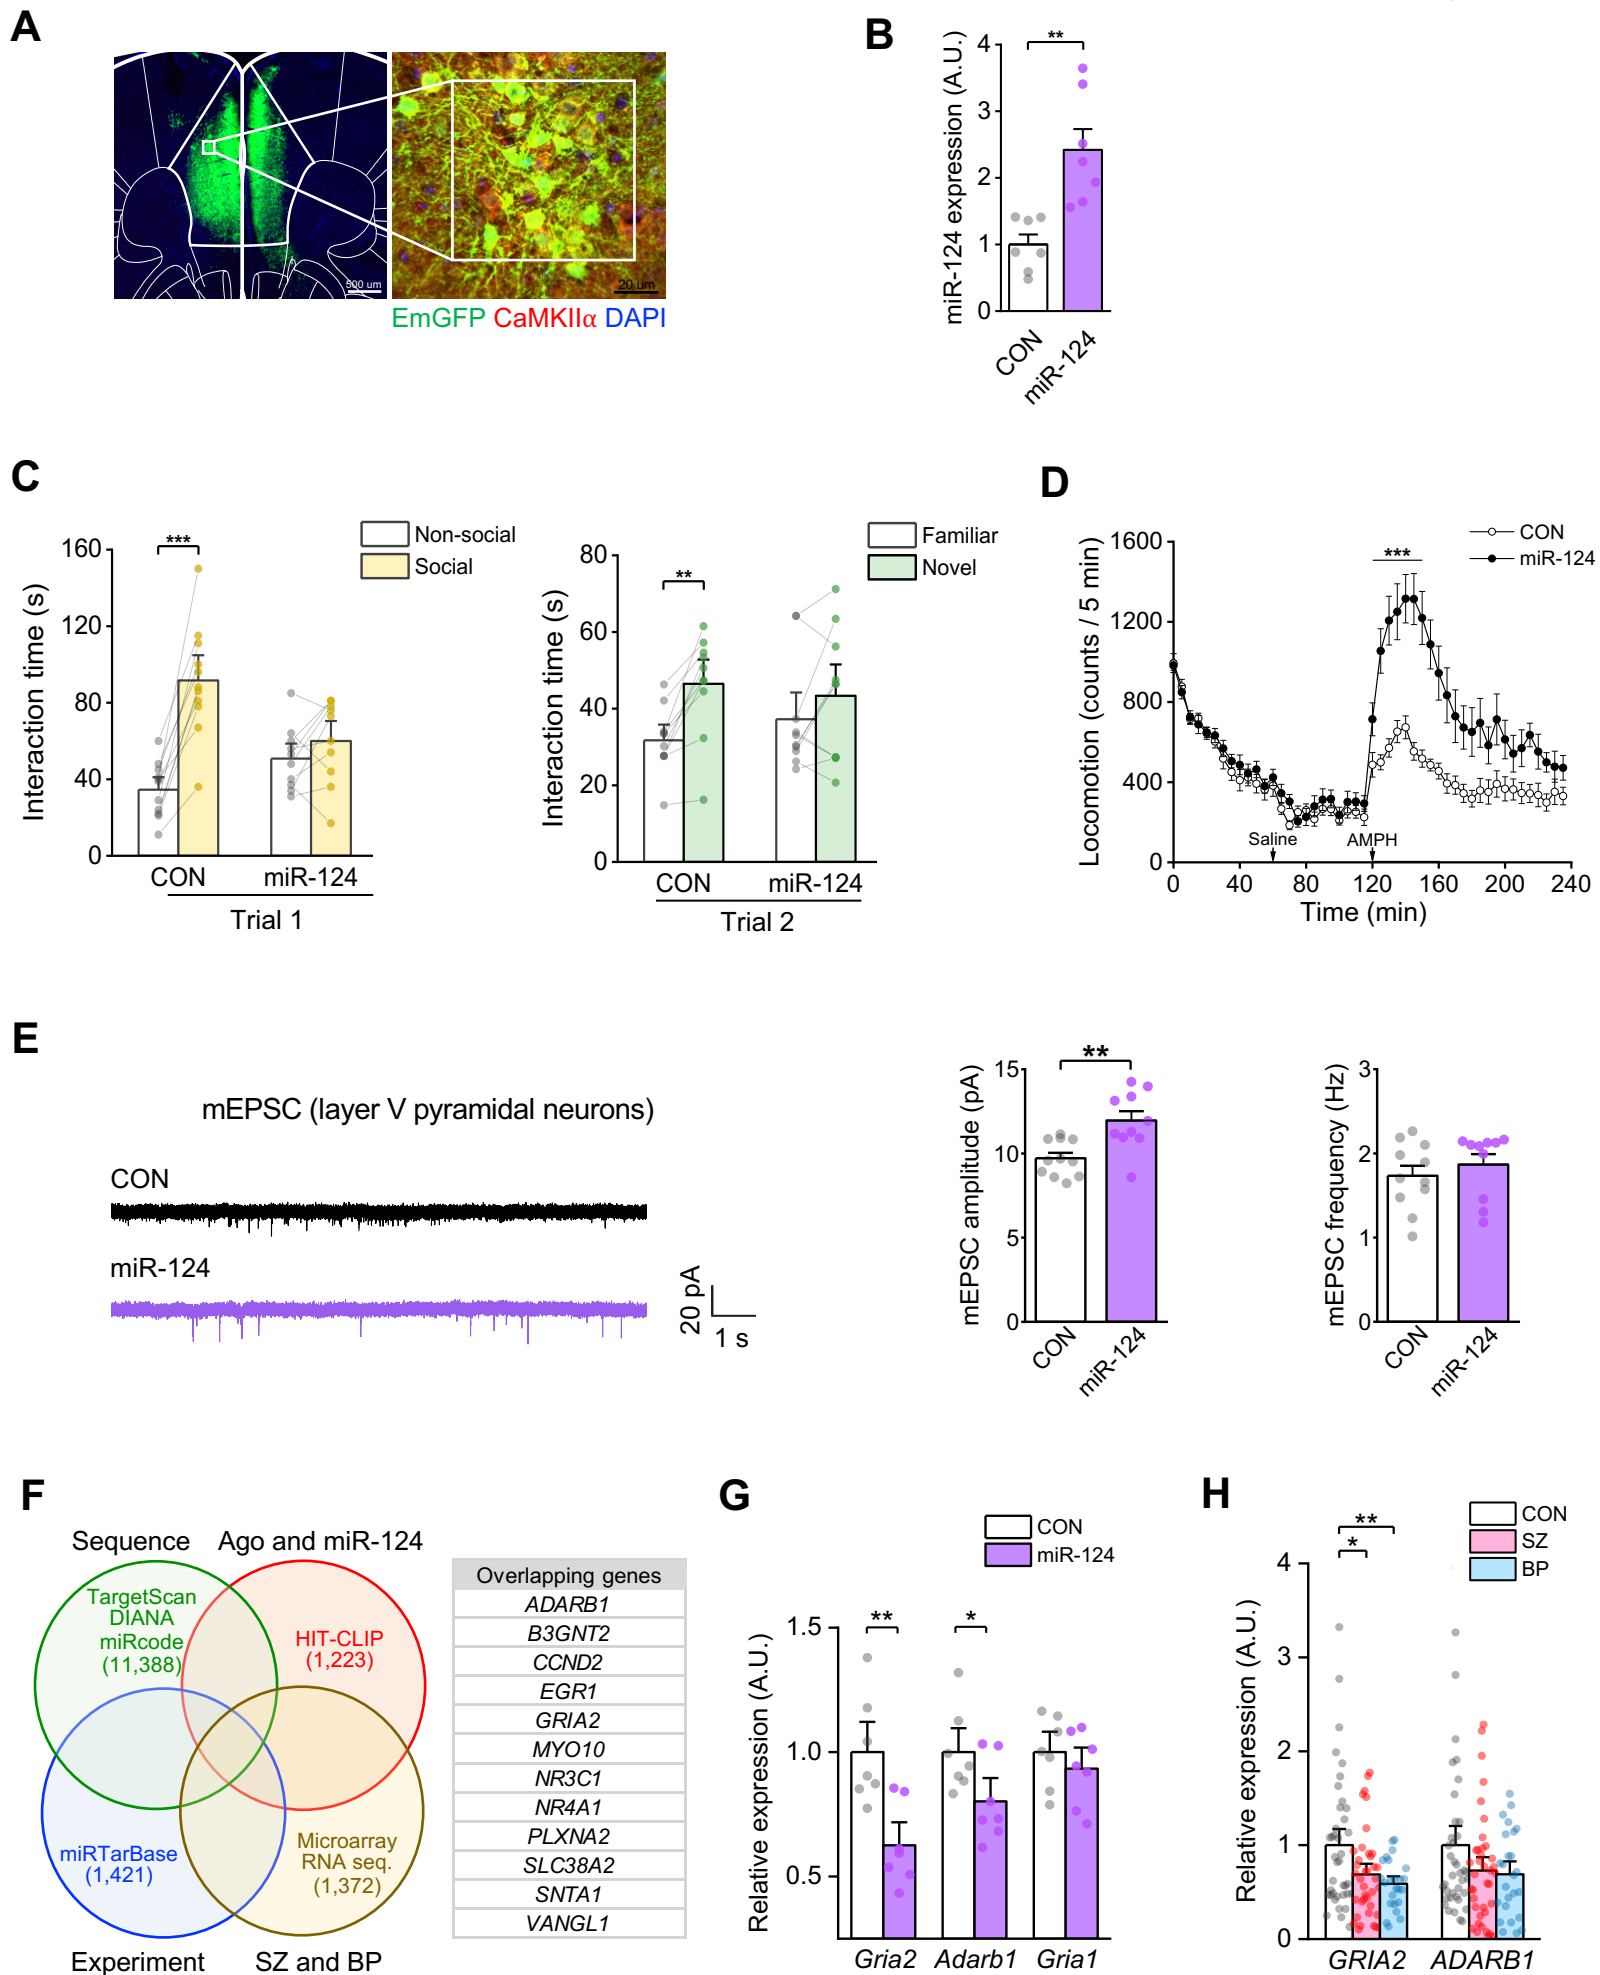

**Figure 3. Overexpression of miR-124 in excitatory neurons of the mouse mPFC causes behavioral and synaptic deficits.** (A) Adeno-associated virus (AAV)-mediated overexpression of miR-124 or miR-control in mPFC excitatory neurons was validated by immunostaining of CaMKIIa and EmGFP that was fused to miR-124 or miR-control. (B) The mPFC excitatory neurons infected with miR-124 or miR-control (CON) AAV were isolated by fluorescence-activated cell sorting (FACS), and the subsequent qRT-PCR detected that miR-124 was increased 2.4-fold in miR-124 AAV-infected excitatory neurons compared with CON AAV-infected ones ( $N_{CON}=7$ ,  $N_{miR-124}=7$ ; two-tailed Student's  $t$ -test,  $t_{12}=-4.095273$ ,  $p=0.0015$ ). (C) Overexpression of miR-124 in mPFC excitatory neurons caused behavioral deficits in both sociability (Trial 1, left) and social novelty recognition (Trial 2, right) in three-chamber social interactions tests. Sociability phase of trial 1 ( $N_{CON}=11$ ,  $N_{miR-124}=10$ ; two-way mixed ANOVA, AAV x Chamber,  $F_{1,19}=21.5188$ ,  $p=0.0001$ ; *post hoc* within-group comparisons using two-tailed paired Student's  $t$ -test). Social novelty recognition phase of trial 2 ( $N_{CON}=11$ ,  $N_{miR-124}=10$ ; two-way mixed ANOVA, AAV x Chamber,  $F_{1,42}=6.9918$ ,  $p=0.016$ ; *post hoc* within-group comparisons using two-tailed paired Student's  $t$ -test). (D) Overexpression of miR-124 in mPFC excitatory neurons caused locomotor hypersensitivity to a psychostimulant, amphetamine (AMPH). The between-group contrast was most evident for the first 30 min after the *i.p.* injection of AMPH ( $N_{CON}=14$ ,  $N_{miR-124}=14$ ; two-way mixed ANOVA with the Greenhouse-Geisser correction, AAV x Time,  $F_{2,226,57,866}=9.065$ ,  $p=2.3410^{-4}$ ; *post hoc* two-tailed paired  $t$ -test for each time point). (E) Representative traces of mEPSC recordings in mPFC layer V pyramidal neurons in brain slices from mice infected with miR-124 or CON AAV (left). The miR-124-overexpressing layer V pyramidal neurons showed significant increase in the amplitude of mEPSCs (middle;  $N_{CON}=11$ ,  $N_{miR-124}=10$ ; two-tailed student's  $t$ -test,  $t_{19}=-3.590$ ,  $p=0.002$ ). However, there was no change in the frequency of mEPSCs (right;  $N_{CON}=11$ ,  $N_{miR-124}=10$ ; two-tailed student's  $t$ -test,  $t_{19}=-0.787$ ,  $p=0.441$ ). (F) Downstream targets of miR-124 were predicted by identifying the overlapping genes from the following four types of prediction databases: 1) sequence-matched putative target database merging the datasets from TargetScan, DIANA, and miRcode; 2) Ago-miRNA-mRNA interaction database, for which the HIT-CLIP dataset was used; 3) experimentally-screened target database utilizing the miRTarBase dataset; 4) database consisting of the genes downregulated in the cerebral cortex of both SZ and BP patients, for which we used recently published microarray and RNA sequence datasets. (G) *Gria2* and *Adarb1*, but not *Grial*, were found to be significantly downregulated in FACS-isolated miR-124-overexpressing excitatory neurons. *Gria2* ( $N_{CON}=7$ ,  $N_{miR-124}=7$ ; two-tailed student's  $t$ -test,  $t_{12}=3.678$ ,  $p=0.003$ ). *Adarb1* ( $N_{CON}=7$ ,  $N_{miR-124}=7$ ; two-tailed student's  $t$ -test,  $t_{12}=2.220$ ,  $p=0.046$ ). *Grial* ( $N_{CON}=7$ ,  $N_{miR-124}=7$ ; two-tailed student's  $t$ -test,  $t_{12}=0.85$ ,  $p=0.412$ ). (H) Significant downregulation of *GRIA2* and decreasing trend of *ADARB1* were observed in olfactory neuronal cells from SZ and BP patients. *GRIA2* ( $N_{CON}=39$ ,  $N_{SZ}=38$ ,  $N_{BP}=24$ ; Welch's ANOVA,  $F_{2,64,642}=5.268$ ,  $p=0.008$ ; *post hoc* Games-Howell test). *ADARB1* ( $N_{CON}=39$ ,  $N_{SZ}=38$ ,  $N_{BP}=25$ ; one-way ANOVA,  $F_{2,99}=2.188$ ,  $p=0.118$ ; *post hoc* Tukey's HSD test). Bar graph expressed as mean  $\pm$  SEM. \*\* $p < 0.01$ , \*\*\* $p < 0.001$ . More detailed statistical information is in **Table S2**.

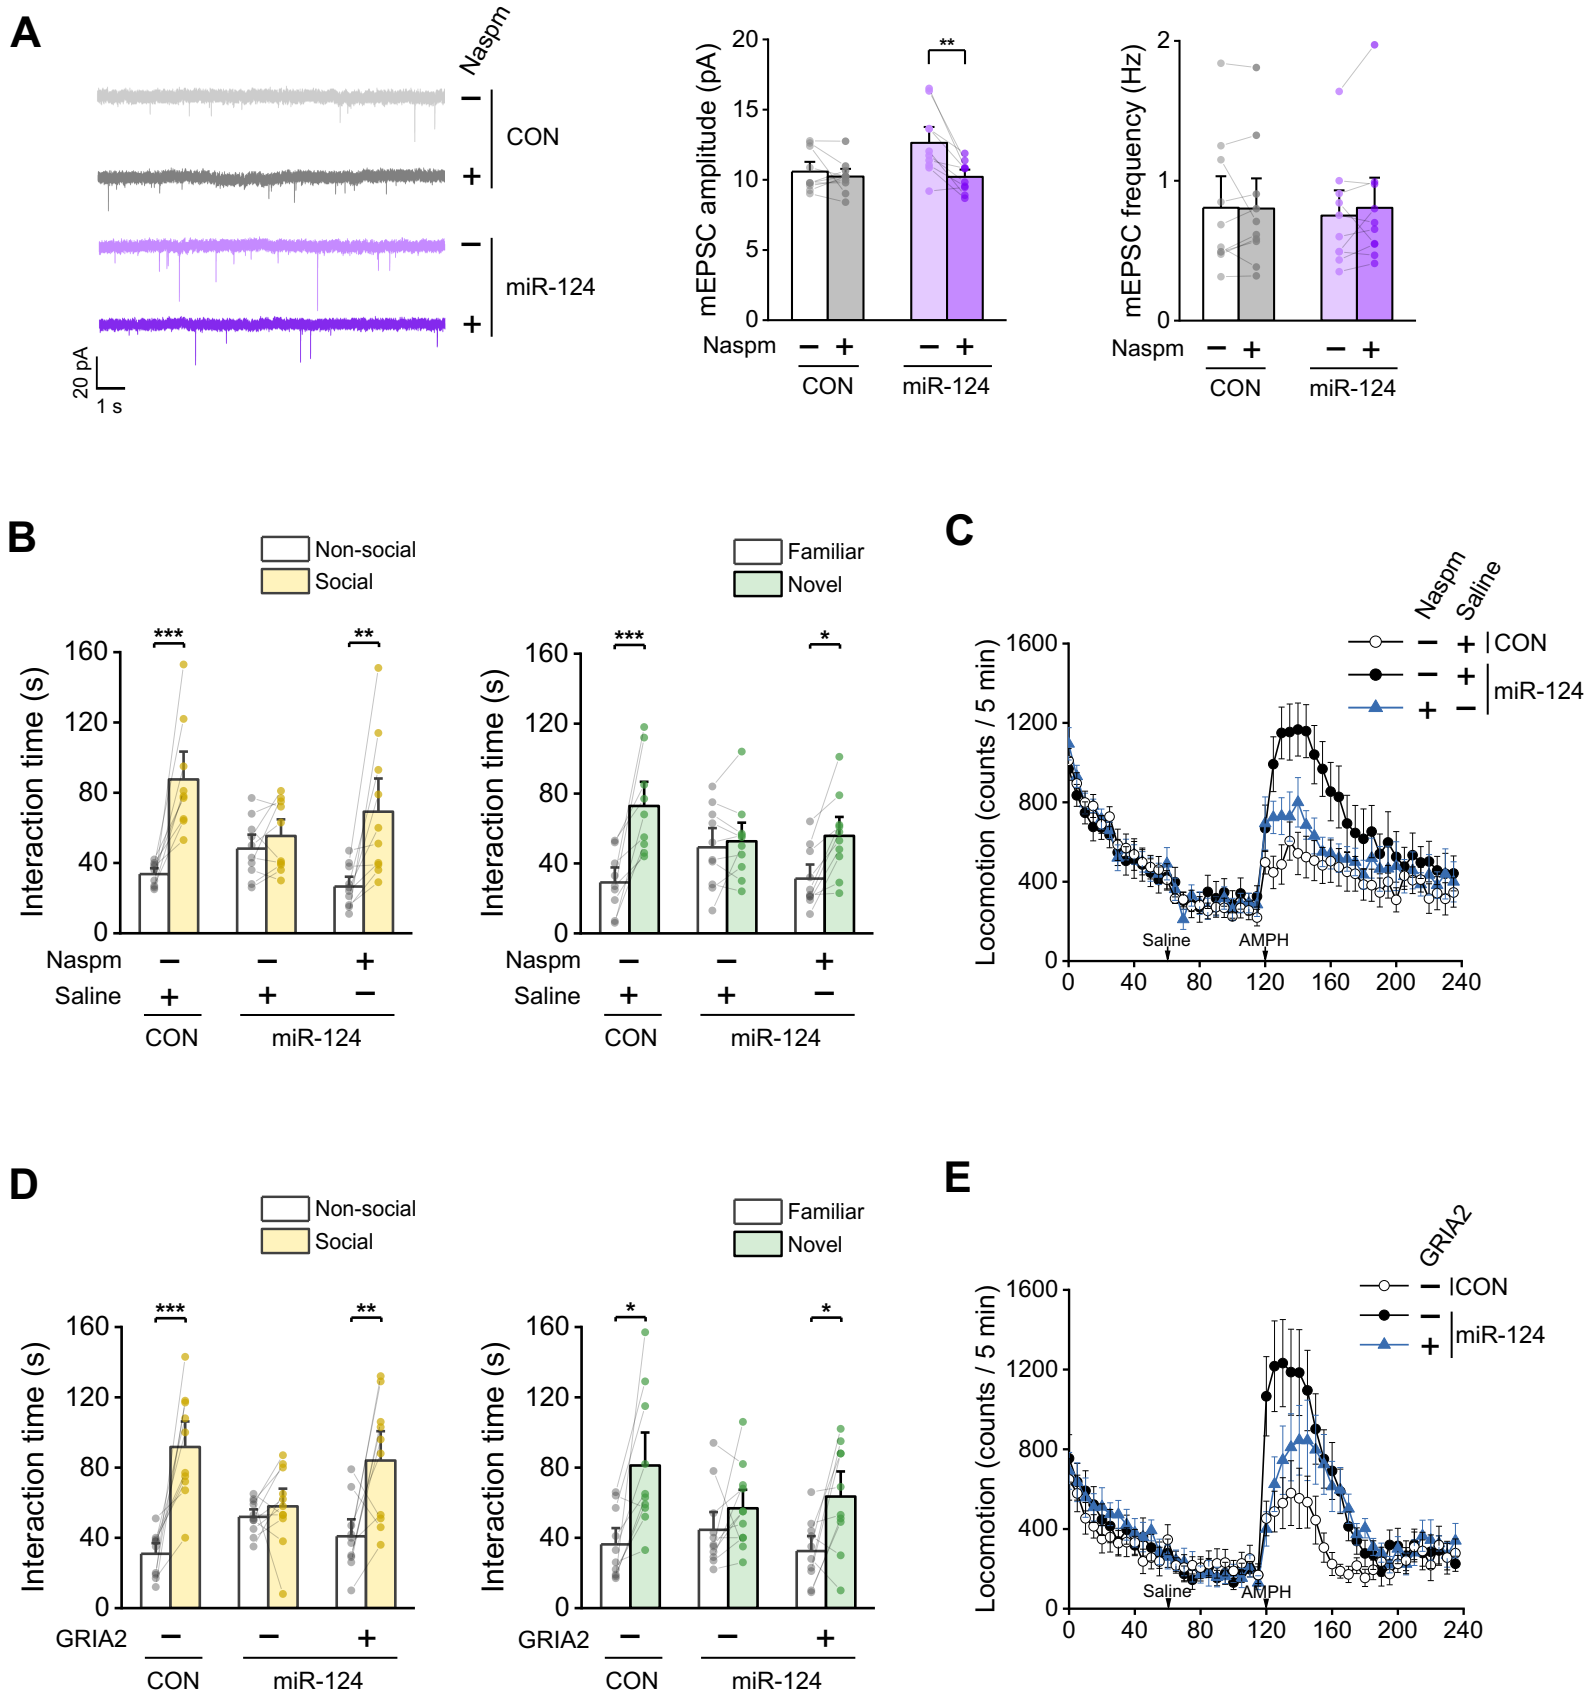

**Figure 4. Blocking GRIA2-lacking CP-AMPA receptors by Naspnm or direct restoration of GRIA2 expression ameliorates the previously observed synaptic and behavioral deficits. (A)**

The increase of mEPSC amplitude in mPFC excitatory neurons, induced by AAV-mediated miR-124 overexpression, was normalized by bath application of Naspnm, a selective antagonist of CP-AMPA receptors. mEPSC amplitude ( $N_{CON}=10$ ,  $N_{miR-124}=10$ ; two-way mixed ANOVA, AAV x Naspnm,  $F_{1,18}=8.454$ ,  $p=0.009$ ; *post hoc* within-group comparisons using two-tailed paired Student's *t*-test). mEPSC frequency ( $N_{CON}=10$ ,  $N_{miR-124}=10$ ; two-way mixed ANOVA, AAV x Naspnm,  $F_{1,18}=0.593$ ,  $p=0.451$ ; *post hoc* within-group comparisons using two-tailed paired Student's *t*-test). **(B)** Behavioral deficits in sociability (left) and social novelty recognition (right), which were induced by miR-124 overexpression in mPFC excitatory neurons, were rescued by local infusion of Naspnm into the mPFC. Sociability phase of trial 1 ( $N_{CON AAV + Saline}=9$ ,  $N_{miR-124 AAV + Saline}=10$ ,  $N_{miR-124 AAV + Naspnm}=10$ ; miR-124 AAV + Saline vs. miR-124 AAV + Naspnm, two-way mixed ANOVA, Intervention x Chamber,  $F_{1,18}=6.725$ ,  $p=0.018$ ; *post hoc* within-group comparisons using two-tailed paired Student's *t*-test). Social novelty recognition phase of trial 2 ( $N_{CON AAV + Saline}=9$ ,  $N_{miR-124 AAV + Saline}=10$ ,  $N_{miR-124 AAV + Naspnm}=10$ ; miR-124 AAV + Saline vs. miR-124 AAV + Naspnm, two-way mixed ANOVA, Intervention x Chamber,  $F_{1,18}=9.276$ ,  $p=0.007$ ; *post hoc* within-group comparisons using two-tailed paired Student's *t*-test). **(C)** Locomotor hypersensitivity to AMPH, induced by overexpression of miR-124 in mPFC excitatory neurons, was ameliorated by local infusion of Naspnm into the mPFC. The ameliorating effect was most evident for the first 15 min after the *i.p.* injection of AMPH ( $N_{CON AAV + Saline}=12$ ,  $N_{miR-124 AAV + Saline}=13$ ,  $N_{miR-124 AAV + Naspnm}=10$ ; miR-124 AAV + Saline vs. miR-124 AAV + Naspnm, two-way mixed ANOVA with the Greenhouse-Geisser correction, Intervention x Time,  $F_{1,542,32,391}=9.671$ ,  $p=0.001$ ; *post hoc* two-tailed paired *t*-test for each time point). **(D)** Behavioral deficits in sociability (left) were rescued by AAV-mediated restoration of GRIA2. Behavioral deficits in social novelty recognition (right) were ameliorated, but not robustly rescued, by the restoration of GRIA2. Sociability phase of trial 1 ( $N_{CON AAV + No-GRIA2 AAV}=10$ ,  $N_{miR-124 AAV + No-GRIA2 AAV}=11$ ,  $N_{miR-124 AAV + GRIA2 AAV}=10$ ; miR-124 AAV + No-GRIA2 AAV vs. miR-124 AAV + GRIA2 AAV, two-way mixed ANOVA, Intervention x Chamber,  $F_{1,19}=5.741$ ,  $p=0.027$ ; *post hoc* within-group comparisons using two-tailed paired Student's *t*-test). Social novelty recognition phase of trial 2 ( $N_{CON AAV + No-GRIA2 AAV}=10$ ,  $N_{miR-124 AAV + No-GRIA2 AAV}=11$ ,  $N_{miR-124 AAV + GRIA2 AAV}=10$ ; miR-124 AAV + No-GRIA2 AAV vs. miR-124 AAV + GRIA2 AAV, two-way mixed ANOVA, Intervention x Chamber,  $F_{1,19}=1.876$ ,  $p=0.187$ ; *post hoc* within-group comparisons using two-tailed paired Student's *t*-test). **(E)** Locomotor hypersensitivity to AMPH, induced by overexpression of miR-124 in mPFC excitatory neurons, was ameliorated by AAV-mediated restoration of GRIA2. The ameliorating effect was most evident for the first 60 min after the *i.p.* injection of AMPH ( $N_{CON AAV + No-GRIA2 AAV}=11$ ,  $N_{miR-124 AAV + No-GRIA2 AAV}=10$ ,  $N_{miR-124 AAV + GRIA2 AAV}=11$ ; miR-124 AAV + No-GRIA2 AAV vs. miR-124 AAV + GRIA2 AAV, two-way mixed ANOVA with the Greenhouse-Geisser correction, Intervention x Time,  $F_{2,593,49,262}=6.301$ ,  $p=0.002$ ; *post hoc* two-tailed paired *t*-test for each time point). Bar graph expressed as mean  $\pm$  SEM. \* $p < 0.05$ , \*\* $p < 0.01$ , \*\*\* $p < 0.001$ . More detailed statistical information is in **Table S2**.
